# Supplementary material for: Good Practices in Sponge Natural Product Studies: Revising Vouchers with Isomalabaricane Triterpenes
Source: MDPI journal article supplement (doi:10.3390/md20030190), 2022-03-04
Supplement: s1 [file s1]

**Table S1** List of publications (1981-2022) reporting isomalabaricane triterpenes and derivatives from marine sponges (sorted by date).

Original species identification. Lines in light green, vouchers originally identified as *Jaspis*. Lines in light blue, vouchers originally identified as *Stelletta*. Lines in light purple, vouchers originally identified as *Geodia*. Lines uncolored, vouchers originally identified as *Rhabdastrella*.

Compounds. In bold, new compounds reported. In black, isomalabaricane triterpene compounds; **in red**: sterols; **in green**: other types of compounds.

Abbreviations: CASIZ: California Academy of Sciences Invertebrate Zoology, San Francisco, CA, USA; CRRF: Coral Reef Research Foundation, Palau; GBR: Great Barrier Reef, E. Australia; IRD: Institut pour la Recherche et le Developpement, Nouméa, New Caledonia; PDZ, University of Utah collection, Salt Lake City, USA; QMG: Queensland Museum, Brisbane, Australia; UCMPW, University of California Museum of Paleontology, Berkeley, CA; USP, Regional Herbarium, School of Pure and Applied Sciences, University of the South Pacific, Fiji; WAM: Western Australian Museum; ZMAPOR: Amsterdam Porifera collection, now stored at Naturalis, Leiden, The Netherlands.

| Original species identification in ref. | Locality                        | Compounds                                                                                                                                        | Sponge identifier and ref.                               | Description in ref.                                       | Voucher                            | Revised Identification  | Authorship of revised identification          |
|-----------------------------------------|---------------------------------|--------------------------------------------------------------------------------------------------------------------------------------------------|----------------------------------------------------------|-----------------------------------------------------------|------------------------------------|-------------------------|-----------------------------------------------|
| <i>Jaspis stellifera</i>                | Suva, Fiji                      | <b>Stellettins ?, B, G</b> (B and G named retrospectively)                                                                                       | - Ravi, Wells & Croft (1981)                             | Ext: chocolate brown, Int: butter-color to intense yellow | -                                  | <i>R. globostellata</i> | Kennedy (2000)                                |
| <i>Jaspis stellifera</i>                | Heron Island, GBR               | <b>4 triterpenes</b> including <b>stelliferin A-like</b>                                                                                         | - Ravi & Wells (1982)                                    | -                                                         | -                                  | <i>R. globostellata</i> | Kennedy (2000)                                |
| <i>Stelletta</i> sp.                    | Mogadishu, Somalia              | Stellettin B                                                                                                                                     | P. Bergquist, McCabe et al. (1982)                       | Ext: brown, Int: yellow                                   | -                                  | <i>R. globostellata</i> | This study (based on color)                   |
| <i>Jaspis stellifera</i>                | Ishigaki Island, Okinawa, Japan | <b>Stelliferins A-F</b>                                                                                                                          | Jane Fromont, Tsuda et al. (1991)                        | Ext: brown, Int: bright yellow                            | -                                  | <i>R. globostellata</i> | Kennedy (2000) and Jane Fromont, (pers. com). |
| <i>Stelletta tenuis</i>                 | Hainan, South China Sea         | <b>Stellettin A</b> (yellow pigment)                                                                                                             | Jin-He Li, Su et al. (1994)                              | -                                                         | #91-6 (not seen in this study)     | <i>R. globostellata</i> | This study (based on identifier and authors)  |
| <i>Stelletta globostellata</i>          | Mage Shima Island, Japan        | <b>Globostellatic acids A-D</b><br><br><b>9-hydroxystelliferin D, 3-<i>epi</i>-29-hydroxystelliferin E, 3-<i>epi</i>-29-hydroxystelliferin A</b> | Rob van Soest, Ryu et al. (1996)<br><br>Oku et al (2000) | -                                                         | ZMA POR 11016 (slide ZMAPOR P2724) | <i>R. globostellata</i> | This study (slide examined + deck picture)    |

|                          |                                      |                                                                      |                                                                        |                                                           |                                                                                                                                                                                                                                                     |                                         |                                                                                                            |
|--------------------------|--------------------------------------|----------------------------------------------------------------------|------------------------------------------------------------------------|-----------------------------------------------------------|-----------------------------------------------------------------------------------------------------------------------------------------------------------------------------------------------------------------------------------------------------|-----------------------------------------|------------------------------------------------------------------------------------------------------------|
|                          |                                      |                                                                      |                                                                        |                                                           |  <p>Picture courtesy from R. van Soest</p>  <p>Picture from spicule slide</p> |                                         |                                                                                                            |
| <i>Jaspis stellifera</i> | Ishigaki Island,<br>Okinawa, Japan   | <b>Jaspiferals A-G*</b>                                              | Jane Fromont,<br>Kobayashi et al. (1996)                               | Ext: brown                                                | -                                                                                                                                                                                                                                                   | <i>R. globostellata</i>                 | Kennedy (2000)<br>and Jane Fromont,<br>(pers. com).                                                        |
| <i>Stelletta</i> sp.     | Cape Wilberforce,<br>North Australia | <b>Stellettins C-F,</b><br>stellettins A-B,<br>stellettin G          | Shirley Pomponi<br>McCormick et al (1996),<br><br>McKee et al., (1997) | Spherical,<br>Ext: brown-<br>purple, Int:<br>brown yellow | Q66C4702 (Smithsonian)<br><br> <p>Picture from spicule slide, courtesy<br/>of C. Castello-Branco</p>                                                            | <i>R. globostellata</i>                 | This study (based<br>on description and<br>pictures of the<br>spicules sent by<br>the Smithsonian<br>NMNH) |
| <i>R. globostellata</i>  | Hainan Island,<br>South China Sea    | <b>Rhabdastrellic acid-A</b><br>( = <i>E</i> isomer of stellettin G) | Rob van Soest,<br>Rao et al (1997)                                     | yellow                                                    | SS301<br>= ZMAPOR 12451<br>(slide ZMAPOR P2703)                                                                                                                                                                                                     | ID confirmed<br>(‘brain’<br>morphotype) | This study (slide<br>examined + deck<br>picture)                                                           |

|                         |               |                     |                                                  |   |                                                                                                                                                                                                                                                     |              |                             |
|-------------------------|---------------|---------------------|--------------------------------------------------|---|-----------------------------------------------------------------------------------------------------------------------------------------------------------------------------------------------------------------------------------------------------|--------------|-----------------------------|
|                         |               |                     |                                                  |   |  <p>Picture courtesy from R. van Soest</p>  <p>Picture from spicule slide</p> |              |                             |
| <i>R. globostellata</i> | New Caledonia | <b>Aurorals 1-4</b> | Claude Lévi,<br>Bourguet-Kondracki et al. (2000) | - | <p>IRD R1481</p>  <p>Picture courtesy from C. Debitus</p>                  | ID confirmed | This study (slide examined) |

|                               |                                       |                                                                                                                                                                                                                                                              |                                                                                                   |   |                                                                                                                                                                   |                         |                                                                                                               |
|-------------------------------|---------------------------------------|--------------------------------------------------------------------------------------------------------------------------------------------------------------------------------------------------------------------------------------------------------------|---------------------------------------------------------------------------------------------------|---|-------------------------------------------------------------------------------------------------------------------------------------------------------------------|-------------------------|---------------------------------------------------------------------------------------------------------------|
|                               |                                       |                                                                                                                                                                                                                                                              |                                                                                                   |   | Picture from spicule slide                                                                                                                                        |                         |                                                                                                               |
| <i>Jaspis</i> sp.             | Emae, Vanuatu Islands                 | <b>Globostellatic acid E, 3-O-acetyljaspiferal B–D and G, jaspiferoic acids A–B dimethyl esters, globostellatic acids B–C</b>                                                                                                                                | John N. A. Hooper, Zampella et al. (2000)                                                         | - | QMG 306893 = IRD R1624<br><br>Pictures of spicules: cf. Kennedy, 2000, Fig. 7) | <i>R. globostellata</i> | Kennedy (2000) and this study (pictures of spicules)                                                          |
| <i>Geodia globostellifera</i> | Vanua Levu, Fiji                      | <b>Stelliferin A riboside</b> (=3- <i>Epi</i> -stelliferin A 22- $\alpha$ -ribopyranoside), stellettins A-B                                                                                                                                                  | John N. A. Hooper, Tabudravu & Jaspars (2001)                                                     | - | USP 9712SD114<br><br>Picture from spicule slide                                | <i>R. globostellata</i> | Mary Kay Harper in Tasdemir et al. (2002) and Cárdenas et al. (2011), specimen examined and barcoded (COI).   |
| <i>Geodia japonica</i>        | Xisha Island, Hainan, South China Sea | <b>geoditins A–B*</b> , stellettins A–B, <b>26-methylergosta-5,24(28)-dien-7-one-3-ol</b> , <b>24(28)dehydroaplysterol</b> , <b>24-methylenecholesterol</b> , <i>cyclo</i> ( <i>S</i> -leucyl- <i>S</i> -prolyl), <i>palmitic acid</i> , <i>malonic acid</i> | Li Chupu, Zhang & Che (2001)<br><br>+ see activity of Stellettin A (Liu et al., 2005; 2006; 2012) | - | ZWH95004 (lost, Prof. Jun Xu, pers. comm.)                                                                                                                        | <i>Geodia</i> sp.       | This study ( <i>G. japonica</i> is a temperate, cold water species so this is probably a mis-identification). |
| <i>Jaspis</i> sp.             | Vava'u, Tonga, South Pacific          | <b>29-hydroxystelliferin E, 29-hydroxystelliferin A, stelliferin G, 3-<i>epi</i>-29-hydroxystelliferin E</b>                                                                                                                                                 | Michelle Kelly, Meragelman et al. (2001)                                                          | - | CRRF 0CDN5445-C = CASIZ 300204                                                                                                                                    | <i>R. globostellata</i> | Michelle Kelly in Tasdemir et al. (2002)                                                                      |

|                          |                                   |                                                                                                                                                                                                                                                  |                                                                |   |                                                                                                                                                                                                       |                                                  |                                                                        |
|--------------------------|-----------------------------------|--------------------------------------------------------------------------------------------------------------------------------------------------------------------------------------------------------------------------------------------------|----------------------------------------------------------------|---|-------------------------------------------------------------------------------------------------------------------------------------------------------------------------------------------------------|--------------------------------------------------|------------------------------------------------------------------------|
|                          |                                   |                                                                                                                                                                                                                                                  |                                                                |   | 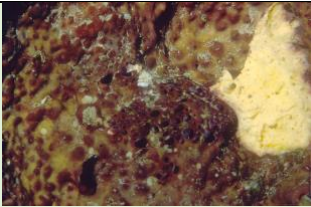 <p>Picture courtesy of CRRF</p>                                                                                   |                                                  |                                                                        |
| <i>R. globostellata</i>  | Mindanao, Philippines             | <b>Stellettins H–I</b> ,<br>stellettins A–D,<br>(–)-stelettin E,<br>rhabdastrellic acid-A                                                                                                                                                        | Mary Kay Harper,<br>Tasdemir et al (2002)                      | - | PDZ <sub>1</sub> 98-1-10<br>(University of Utah)<br> <p>Picture from spicule slide</p>                             | <i>Rhabdastrella</i> cf.<br><i>globostellata</i> | Cárdenas et al.<br>(2011), specimen<br>examined and<br>barcoded (COI). |
| <i>R. aff. distincta</i> | Hainan Island,<br>South China Sea | <b>Isogeoditin A</b> ,<br><b>13-(E)-isogeoditin A</b> ,<br><b>isogeoditin B</b> ,<br><b>22,23-dihydrostellettin B</b> ,<br>geoditins A–B,<br>stellettins A–C, E,<br>rhabdastrellic acid-A<br><br><b>Rhabdastrellins A–F</b> ,<br>stellettins L–M | Rob van Soest,<br>Lv et al. (2004)<br><br><br>Lv et al. (2008) | - | HS-14 (Peking University)<br>= ZMAPOR 2717<br>(slide ZMAPOR P16728)<br> <p>Picture courtesy from R. van Soest</p> | <i>R. globostellata</i>                          | This study (slide<br>examined + deck<br>photo)                         |

|                         |                                      |                                                                                                                    |                                                                                          |                          |                                                                                                                                                                                                                                                            |                                      |                                                              |
|-------------------------|--------------------------------------|--------------------------------------------------------------------------------------------------------------------|------------------------------------------------------------------------------------------|--------------------------|------------------------------------------------------------------------------------------------------------------------------------------------------------------------------------------------------------------------------------------------------------|--------------------------------------|--------------------------------------------------------------|
|                         |                                      |                                                                                                                    |                                                                                          |                          | 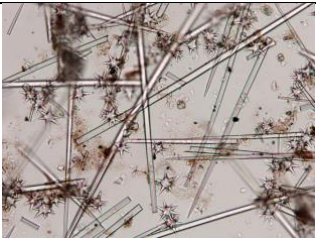 <p>Picture from spicule slide</p>                                                                                                                                      |                                      |                                                              |
| <i>Jaspis</i> sp.       | Sanya,<br>Hainan,<br>South China Sea | <b>22,23-dihydrostellettin D</b><br><br><b>Jaspolides A–F</b><br><br><b>Jaspolides G–H</b><br>(bisisomalabaricane) | Rob van Soest?<br>Tang et al. (2005)<br><br>Tang et al. (2006)<br><br>Tang et al. (2007) | -                        | HSC-39<br> <p>Picture courtesy of Wenhanlin.</p>  <p>Picture from spicule slide</p> | <i>R. globostellata</i>              | This study<br>(slide examined)                               |
| <i>R. globostellata</i> | Fiji                                 | <b>Stelletins J–K,</b><br>stelliferin A riboside,<br>3-epi-29-acetoxystelliferin E                                 | Michelle Kelly,<br>Clement et al. (2006)                                                 | picture in<br>Supp. Mat. | CRRF 0CDN4278-K (deposited at<br>NIWA)                                                                                                                                                                                                                     | ID confirmed<br>(pink<br>morphotype) | This study<br>(picture +<br>voucher examined<br>by M. Kelly) |

|                         |                           |                                                                                                                               |                                   |                                                                                                    |                                                                                                                                                                                                                                                                                           |              |                                          |
|-------------------------|---------------------------|-------------------------------------------------------------------------------------------------------------------------------|-----------------------------------|----------------------------------------------------------------------------------------------------|-------------------------------------------------------------------------------------------------------------------------------------------------------------------------------------------------------------------------------------------------------------------------------------------|--------------|------------------------------------------|
|                         |                           |                                                                                                                               |                                   |                                                                                                    | 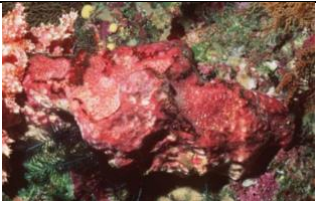 <p>Picture from CRRF</p>                                                                                                                                                                              |              |                                          |
| <i>R. globostellata</i> | South Sulawesi, Indonesia | <b>Globostelletin, globostellatic F–M, two new stelliferin A ribosides, globostellatic acids A, D, stelliferin A riboside</b> | Rob van Soest, Fouad et al (2006) | Spherasters I (20-55)<br>Spherasters II (10-15)<br>Oxyasters/tylasters<br>Trichodragmas (100x5-12) | ZMAPOR17166 (slide ZMAPOR P2693)<br> <p>Picture courtesy from R. van Soest.</p>  <p>Picture from spicule slide</p> | ID confirmed | This study (slide examined + deck photo) |
| <i>R. globostellata</i> | Pith Reef, GBR            | <b>Stelliferin D riboside, stelliferin A, stelliferin A-like</b>                                                              | - Agrawal (2007), PhD thesis      | -                                                                                                  | -                                                                                                                                                                                                                                                                                         | -            | -                                        |



|                         |                                    |                                                                                                                                                                                                                                                               |                                    |   |                                                                                                                                                                                                                                                                                                                                                                           |                          |                                                                                                  |
|-------------------------|------------------------------------|---------------------------------------------------------------------------------------------------------------------------------------------------------------------------------------------------------------------------------------------------------------|------------------------------------|---|---------------------------------------------------------------------------------------------------------------------------------------------------------------------------------------------------------------------------------------------------------------------------------------------------------------------------------------------------------------------------|--------------------------|--------------------------------------------------------------------------------------------------|
| <i>R. globostellata</i> | Sulawesi, Indonesia                | <b>Globostellatic acids X methyl ester 1-4, Globostellatic acid F methyl ester, 13E-Globostellatic acid B methyl ester, Acetyljaspiferol E</b>                                                                                                                | Nicole de Voogd, Aoki et al (2007) | - | <p>ZMAPOR 15784a (slide ZMAPOR P2697)</p>  <p><i>Rhabdastrella</i> covered with <i>Haliclona (Gellius) amboinensis</i> (Picture courtesy from N. de Voogd)</p>  <p>Pictures from spicule slide</p> | <i>Rhabdastrella</i> sp. | This study (slide examined+ underwater picture)                                                  |
| <i>Stelletta tenuis</i> | Sanya Bay, Hainan, South China Sea | <b>Stellettins L–M, stellettins A–E, stellettin H, rhabdastrellic acid-A, 22,23-dihydrostellettin B, geoditin A</b><br><b>24-methylene-27-methylcholestane-3<math>\beta</math>,5<math>\alpha</math>,6<math>\beta</math>-triol,</b><br><b>24-methylene-27-</b> | Jin-He Li, Lin et al. (2007)       | - | <p>HN1120-1 (not seen in this study)</p>                                                                                                                                                                                                                                                                                                                                  | <i>R. globostelletta</i> | This study (according to another voucher examined, identified by Jin-He Li as <i>S. tenuis</i> ) |



|                         |                                   |                                                                                                                                                                                                                                                                                                                                                                                                                               |                                                                    |                                              |                                                                                                                                                                                                                                                                                                        |                                        |                                               |
|-------------------------|-----------------------------------|-------------------------------------------------------------------------------------------------------------------------------------------------------------------------------------------------------------------------------------------------------------------------------------------------------------------------------------------------------------------------------------------------------------------------------|--------------------------------------------------------------------|----------------------------------------------|--------------------------------------------------------------------------------------------------------------------------------------------------------------------------------------------------------------------------------------------------------------------------------------------------------|----------------------------------------|-----------------------------------------------|
|                         |                                   | <p><b>methylcholest-5-ene-3<math>\beta</math>,7<math>\alpha</math>-diol,</b><br/> <b>24-methylene-27-</b><br/> <b>methylcholest-5-ene-3<math>\beta</math>,7<math>\beta</math>-diol,</b><br/> 24-methylene-27-methylcholest-5-en-3<math>\beta</math>-ol-7-one,<br/> 24-methylene-27-methylcholesterol,<br/> 24,25-dimethylcholestane-2<math>\beta</math>,3<math>\alpha</math>,3<math>\alpha</math>-triyl trisodium sulfate</p> |                                                                    |                                              |                                                                                                                                                                                                                                                                                                        |                                        |                                               |
| <i>R. globostellata</i> | Amami-oshima, Japan               | <p><b>Rhabdastins A–G,</b><br/> <b>Rhabdastoside A</b><br/> (triterpene glycoside)</p>                                                                                                                                                                                                                                                                                                                                        | Rob van Soest,<br>Hirashima et al (2010)                           | -                                            | <p>ZMAPOR 16401<br/> (slide ZMAPOR P2690)</p>  <p>Picture courtesy from R. van Soest</p>  <p>Picture from the spicule slide</p> | I.D. confirmed<br>(‘brain’ morphotype) | This study<br>(slide examined + deck picture) |
| <i>R. globostellata</i> | Hainan Island,<br>South China Sea | <p><b>Globostelletins A–I,</b><br/> jaspolide F,<br/> (–)-stellettin E,<br/> stellettins C–D rhabdastrellic acid-A</p> <p><b>Globostelletins J–S</b></p>                                                                                                                                                                                                                                                                      | <p>Nicole de Voogd,<br/>Li et al (2010)</p> <p>Li et al (2012)</p> | Low res. picture of HSF-10 in article banner | <p>HSF-10<br/> = ZMAPOR 17354<br/> (slide ZMAPOR P2700)</p>                                                                                                                                                                                                                                            | ID confirmed                           | This study<br>(slide examined)                |

|                                    |                                      |                                                                                                                                                                                |                                   |                                          |                                                                                                                                                                                                                                                  |                          |                                                                                                                                   |
|------------------------------------|--------------------------------------|--------------------------------------------------------------------------------------------------------------------------------------------------------------------------------|-----------------------------------|------------------------------------------|--------------------------------------------------------------------------------------------------------------------------------------------------------------------------------------------------------------------------------------------------|--------------------------|-----------------------------------------------------------------------------------------------------------------------------------|
|                                    |                                      |                                                                                                                                                                                |                                   |                                          |  <p>Picture courtesy from Li et al.</p>  <p>Picture from spicule slide</p> |                          |                                                                                                                                   |
| <i>R.</i> cf. <i>globostellata</i> | Ishigaki Island, Okinawa, Japan      | <b>Stelliferins J–N</b>                                                                                                                                                        | Jane Fromont, Tanaka et al (2011) | Yellowish-brown, description of spicules | WAM Z59146<br> <p>Picture from spicule slide</p>                                                                                                             | <i>R. globostellata</i>  | This study (voucher examined + COI)                                                                                               |
| <i>Jaspis stellifera</i>           | Guangdong, South China Sea           | <b>Jaspiferins A–B</b><br>gibepyrone F, <i>p</i> -hydroxy benzaldehyde, 3-Indole-3-aldehyde, thymine, 24(28)-dehydroaplysterol, (25 <i>S</i> )-26-methylene-cholest-4-en-3-one | - Tang et al (2012)               | -                                        | XWS-03 (not seen in this study)                                                                                                                                                                                                                  | <i>Rhabdastrella</i> sp. | This study ( <i>J. stellifera</i> is not found in South China Sea, the compounds indicate it is probably a <i>Rhabdastrella</i> ) |
| <i>Stelletta</i> sp.               | Lingshui Bay, Hainan Province, China | <b>Stellettin N</b> , stellettins D, G, H,                                                                                                                                     | Jin-He Li, Xue et al (2013)       | -                                        | YAL-37                                                                                                                                                                                                                                           | <i>R. globostelletta</i> | This study (picture)                                                                                                              |

|                                   |                                          |                                                                                                                                                                                                                                                            |                                                                                          |         |                                                                                                           |                                                    |                                                                                                                                   |
|-----------------------------------|------------------------------------------|------------------------------------------------------------------------------------------------------------------------------------------------------------------------------------------------------------------------------------------------------------|------------------------------------------------------------------------------------------|---------|-----------------------------------------------------------------------------------------------------------|----------------------------------------------------|-----------------------------------------------------------------------------------------------------------------------------------|
|                                   |                                          | Rhabdastrellic acid-A,<br>22,23-dihydrostellettin D                                                                                                                                                                                                        |                                                                                          |         | 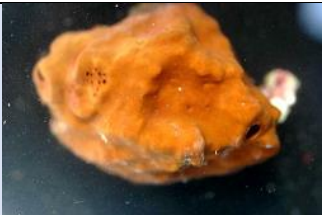                       |                                                    |                                                                                                                                   |
|                                   |                                          |                                                                                                                                                                                                                                                            |                                                                                          |         | Picture courtesy of Xue et al.                                                                            |                                                    |                                                                                                                                   |
| <i>Jaspis stellifera</i>          | South China Sea                          | <b>Jaspiferins C–F</b><br><br><b>Jaspiferin G</b><br>isogeoditin A,<br>13-( <i>E</i> )-isogeoditin A, jaspolide<br>E, 22,23-dihydrostellettin D<br><br><b>Jaspiferin H–J</b> ,<br>stellettin E, F                                                          | Sheng-An Tang,<br>Jin et al (2014)<br><br>Xu et al (2016)<br><br>Xu et al (2018)         | -       | SC20090608<br>(not seen in this study)                                                                    | <i>Rhabdastrella</i> sp.                           | This study ( <i>J. stellifera</i> is not found in South China Sea, the compounds indicate it is probably a <i>Rhabdastrella</i> ) |
| <i>Stelletta tenuis</i>           | Sanya Bay,<br>Hainan,<br>South China Sea | <b>Stellettins O–P, W<sup>1</sup></b> ,<br>stellettins C–D,<br><b>gibepyrone C</b> ,<br><b>gibepyrone F</b><br><br><sup>1</sup> stellettin N was already given<br>to another stellettin by Xue et<br>al. (2013). This one is here<br>renamed stellettin W. | Jin-He Li,<br>Li et al (2015)                                                            | -       | HN1120-5<br><br>       | <i>R. globostelletta</i>                           | This study<br>(voucher<br>examined)                                                                                               |
|                                   |                                          |                                                                                                                                                                                                                                                            |                                                                                          |         | Picture from spicule slide                                                                                |                                                    |                                                                                                                                   |
| <i>Rhabdastrella providentiae</i> | Con Co, Quang Tri,<br>Vietnam            | <b>Rhabdastrellins G–K</b><br>jaspolide C,<br>globostelletin C,<br>globostelletin D<br><br><b>Rhabdaprovidines A–C</b><br>(formed by bio-chemical<br>degradation of ITTs?)<br><br><b>Rhabdaprovidines D–G</b>                                              | Do Cong Thun,<br>Kiem et al (2018)<br><br>Dung et al. (2018a)<br><br>Dung et al. (2018b) | picture | HM06.2016-01<br><br> | <i>R. globostellata</i><br>(‘brain’<br>morphotype) | This study<br>(voucher<br>examined)                                                                                               |

|                      |                      |                                                                                                                                                                   |                                                                                 |                                                       |                                                                                                                                                                                                                                                                                 |                                                     |                                     |
|----------------------|----------------------|-------------------------------------------------------------------------------------------------------------------------------------------------------------------|---------------------------------------------------------------------------------|-------------------------------------------------------|---------------------------------------------------------------------------------------------------------------------------------------------------------------------------------------------------------------------------------------------------------------------------------|-----------------------------------------------------|-------------------------------------|
|                      |                      |                                                                                                                                                                   |                                                                                 |                                                       |  <p>Picture courtesy of Kiem et al.</p>  <p>Picture from spicule slide</p>                                |                                                     |                                     |
| <i>Stelletta</i> sp. | Cham Island, Vietnam | <b>Cyclobutastellettolides A-B</b> ,<br>jaspolide F,<br>globostelletins E-G, K, M<br><br><b>Stellettins Q-R</b> ,<br><b>stellettins S-V</b> ,<br>globostelletin N | Boris B. Grebnev,<br>Kolesnikova et al. (2019)<br><br>Kolesnikova et al. (2021) | picture and<br>complete<br>description of<br>spicules | PIBOC O38-301<br><br> <p>Picture courtesy of Kolesnikova et al.</p>  <p>Picture from spicule slide</p> | <i>R. globostelletta</i><br>(‘brain’<br>morphotype) | This study<br>(voucher<br>examined) |

|                         |                                  |                              |                                 |                                                                                                                                                                                                                                                                                      |                                                                                                                                                            |                               |                      |
|-------------------------|----------------------------------|------------------------------|---------------------------------|--------------------------------------------------------------------------------------------------------------------------------------------------------------------------------------------------------------------------------------------------------------------------------------|------------------------------------------------------------------------------------------------------------------------------------------------------------|-------------------------------|----------------------|
| <i>Rhabdatrella</i> sp. | Kenting, Taiwan                  | <b>Rhabdastin H-I</b>        | Hsing-Hui Li, Lai et al. (2021) | picture (not the one published), 18S (lost)                                                                                                                                                                                                                                          | #2017-1221-SP (but wrong voucher)<br><br>Picture courtesy of Lai et al. | <i>Rhabdastrella</i> sp.      | This study (picture) |
| <i>R. globostellata</i> | Vanphong Bay, Khanh Hoa, Vietnam | <b>Rhabdaglostelones A-C</b> | - Trang et al. (2022)           | COI and 18S markers (in Suppl. Info.)<br><br>Picture courtesy of P. V. Kiem<br><br>Picture from spicule slide | NCCT-B139<br><br>I.D. confirmed ('brain' morphotype)                                                                                                       | This study (voucher examined) |                      |
